# Supplementary material
Source: publisher figshare collection journal article supplement (https://gsajournals.figshare.com/ndownloader/files/24527420)
Supplement: Supplementary file 1 [file 24527420]

## Sheet: Sheet1
TABLE S1 YEAST STRAINS
Strain (Synonym)	Genotype	Autonomous plasmids	Reference (Source)
BY4741	MATa ura3Δ0 leu2Δ0 his3Δ1 lys2Δ0 met15Δ0		wiki.yeastgenome.org/index.php/Commonly_used_strains
YB555	MATa ura3Δ0 leu2Δ0 his3Δ1 lys2Δ0 met15Δ0	pCS316	This laboratory (Ura+ transformant of BY4741)
BY4742	MATα ura3Δ0 leu2Δ0 his3Δ1		wiki.yeastgenome.org/index.php/Commonly_used_strains
BY4743	MATa/α his3Δ1/his3Δ1 leu2Δ0/leu2Δ0 LYS2/lys2Δ0 met15Δ0/MET15 ura3Δ0/ura3Δ0		wiki.yeastgenome.org/index.php/Commonly_used_strains; diploid cross of BY4741 and BY4742
YB556	MATa/α his3Δ1/his3Δ1 leu2Δ0/leu2Δ0 LYS2/lys2Δ0 met15Δ0/MET15 ura3Δ0/ura3Δ0	pCS316	This laboratory (Ura+ transformant of BY4743)
YA288	MATa ura3Δ0 leu2Δ0 his3Δ1 lys2Δ0 met15Δ0 csm2::KanMX		wiki.yeastgenome.org/index.php/Commonly_used_strains (csm2::KanMX insertion in BY4741)
YB557	MATa ura3Δ0 leu2Δ0 his3Δ1 lys2Δ0 met15Δ0 csm2::KanMX	pCS316	wiki.yeastgenome.org/index.php/Commonly_used_strains (Ura+ transformant of BY4743)
YB204	MATα ura3-52 his3-Δ200 ade2-101 lys2-801 trp1-Δ1 gal3 trp1::[his3-Δ3’::HOcs, his3- Δ5’] leu2-Δ1		Dong and Fasullo (2003)
YB177	MATα ura3-52 his3-Δ200 ade2-101 lys2-801 trp1-Δ1 gal3 trp1::[his3- Δ3’::HOcs, his3-Δ5’] leu2-Δ1 rad51	pCS316	Fasullo et al., (2008)
YB558	MATa ura3-52 his3 lys2-801 trp1-Δ1 gal3 trp1::[his3-Δ3’::HOcs, his3- Δ5’] csm2::KanMX		This laboratory (meiotic segregant from YA288 and YB204)
YB559	MATa ura3-52 his3 lys2-801 trp1- Δ1 gal3 trp1::[his3- Δ 3’::HOcs, his3-Δ5’] csm2::KanMX	pCS316	This laboratory (Ura+ Transformant of YB558)
YA289	MATα can1Δ ::STE2 pr-Sp_his5 lyp1Δ::STE3pr-LEU2 his3Δ1 leu2Δ0 ura3Δ0 rad4::NatMX		Haico Van Atticum
YB600	MATa his3Δ1 leu2Δ0 ura3Δ0 csm2::KanMX rad4::NatMX		This laboratory (meiotic segregant from YB558 and YA289)
YB661	MATa-inc ura3-52 his3- Δ200 ade2-101 lys2-801 trp1- Δ1 gal3 trp1::[his3-Δ3’::HOcs, his3-Δ5’] csm2::KanMX rad51::URA3		This laboratory (rad51 knock-out in YB558)
YB662	MATa-inc ura3-52 his3- Δ200 ade2-101 lys2-801 trp1- Δ1 gal3 trp1::[his3-Δ3’::HOcs, his3-Δ5’] csm2::KanMX rad51		This laboratory (FOA resistant isolate of YB661)
YB663	MATa-inc ura3-52 his3- Δ200 ade2-101 lys2-801 trp1- Δ1 gal3 trp1::[his3- Δ 3’::HOcs, his3- Δ 5’]csm2::KanMX rad51	pCS316	This laboratory (Ura+ Transformant of YB662)
